# Supplementary material for: A homochiral network constructed by supramolecular packing of 2D chiral bilayer: synthesis, structure and property of metal(ii) complex based on achiral 3,3′,4,4′-oxydiphthalate and coligand
Source: Royal Society of Chemistry journal article supplement (doi:10.1039/c2ce25702e), 2012-01-01
Supplement: c2ce25702e.pdf [file c2ce25702e.pdf]

**A homochiral network constructed by supramolecular packing of 2D  
chiral bilayer: synthesis, structure and property of metal(II) complex  
based on achiral 3, 3', 4, 4'-oxydiphthalate and coligand**

**Yun Gong, Jian Li, Jianbo Qin and Jianhua Lin\***

*Department of Chemistry, College of Chemistry and Chemical Engineering,  
Chongqing University, Chongqing 400030, P. R. China.*

**Table S1** Selected bond lengths (Å) and bond angles (°) for complexes **1-4**

| <i>Complex 1</i>  |            |                   |            |
|-------------------|------------|-------------------|------------|
| Ni(1)-O(3)        | 2.047(5)   | Ni(1)-O(6)        | 2.060(6)   |
| Ni(1)-O(7)        | 2.061(5)   | Ni(1)-O(1)        | 2.093(6)   |
| Ni(1)-N(1)        | 2.108(6)   | Ni(1)-N(2)#1      | 2.077(5)   |
| O(3)-Ni(1)-O(7)   | 178.5(2)   | O(3)-Ni(1)-O(6)   | 88.9(3)    |
| N(2)#1-Ni(1)-N(1) | 178.7(3)   | O(6)-Ni(1)-N(2)#1 | 87.6(3)    |
| O(1)-Ni(1)-N(1)   | 92.1(3)    | O(7)-Ni(1)-N(1)   | 89.7(3)    |
| <i>Complex 2</i>  |            |                   |            |
| Cu(1)-O(12)#2     | 1.956(4)   | Cu(1)-O(19)       | 2.566(7)   |
| Cu(2)-O(13)#2     | 1.955(4)   | Cu(2)-O(6)        | 2.258(4)   |
| Cu(2)-N(1)        | 2.013(6)   | Cu(2)-N(2)        | 1.989(5)   |
| O(16)-Cu(1)-O(19) | 176.08(17) | O(6)-Cu(1)-N(3)   | 176.55(19) |
| N(3)-Cu(1)-O(19)  | 77.2(2)    | O(16)-Cu(2)-O(6)  | 82.41(15)  |
| N(4)-Cu(1)-N(3)   | 80.7(2)    | N(2)-Cu(2)-N(1)   | 79.7(2)    |
| <i>Complex 3</i>  |            |                   |            |
| Co(1)-O(13)       | 2.108(2)   | Co(1)-O(14)       | 2.1414(18) |
| Co(1)-N(3)        | 2.131(2)   | Co(2)-N(1)        | 2.143(3)   |

---

|                   |           |                     |            |
|-------------------|-----------|---------------------|------------|
| Co(2)-N(2)        | 2.131(2)  | Co(2)-O(8)          | 2.0774(17) |
| Co(2)-O(10)       | 2.093(2)  | Co(2)-O(11)         | 2.091(2)   |
| O(13)-Co(1)-O(14) | 84.93(8)  | O(14)#3-Co(1)-O(14) | 172.63(10) |
| O(8)-Co(2)-O(11)  | 84.68(8)  | O(8)-Co(2)-O(12)    | 172.32(7)  |
| N(3)#3-Co(1)-N(3) | 77.33(12) | N(2)-Co(2)-N(1)     | 75.88(9)   |
| O(8)-Co(2)-N(1)   | 88.77(8)  | O(13)#3-Co(1)-N(3)  | 172.53(9)  |

**Complex 4**

|                   |          |                   |          |
|-------------------|----------|-------------------|----------|
| Zn(1)-O(6)        | 1.905(6) | Zn(1)-O(1)        | 1.924(6) |
| Zn(1)-O(8)        | 1.949(6) | Zn(1)-O(3)#4      | 1.927(6) |
| O(6)-Zn(1)-O(8)   | 92.2(3)  | O(3)#4-Zn(1)-O(8) | 122.0(3) |
| O(6)-Zn(1)-O(3)#4 | 98.9(3)  | O(6)-Zn(1)-O(1)   | 122.9(3) |

---

Symmetry transformations used to generate equivalent atoms:

#1  $x+1, y, z$     #2  $-x, -y+1, -z$     #3  $-x, y, -z+1/2$     #4  $-x, -y+1, -z+1$

(a)

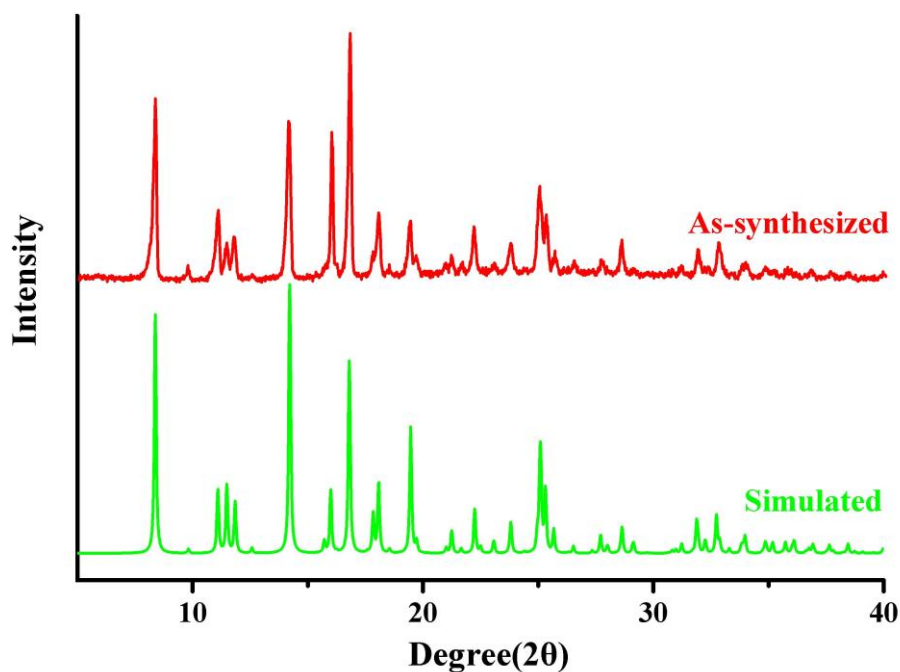

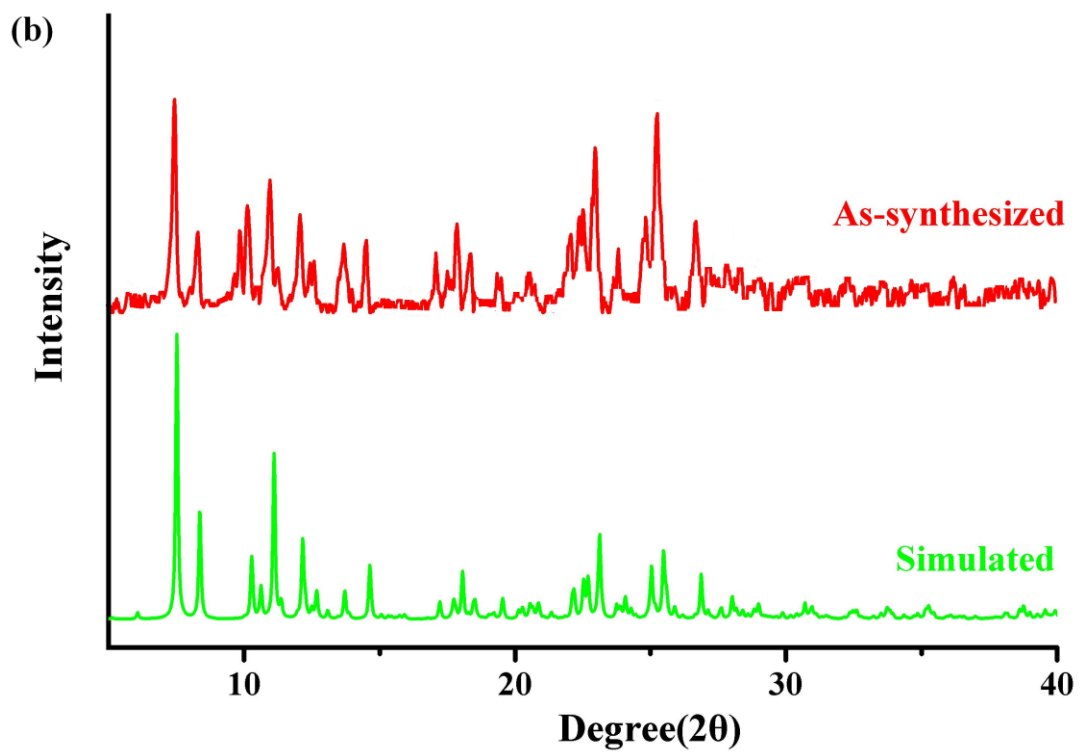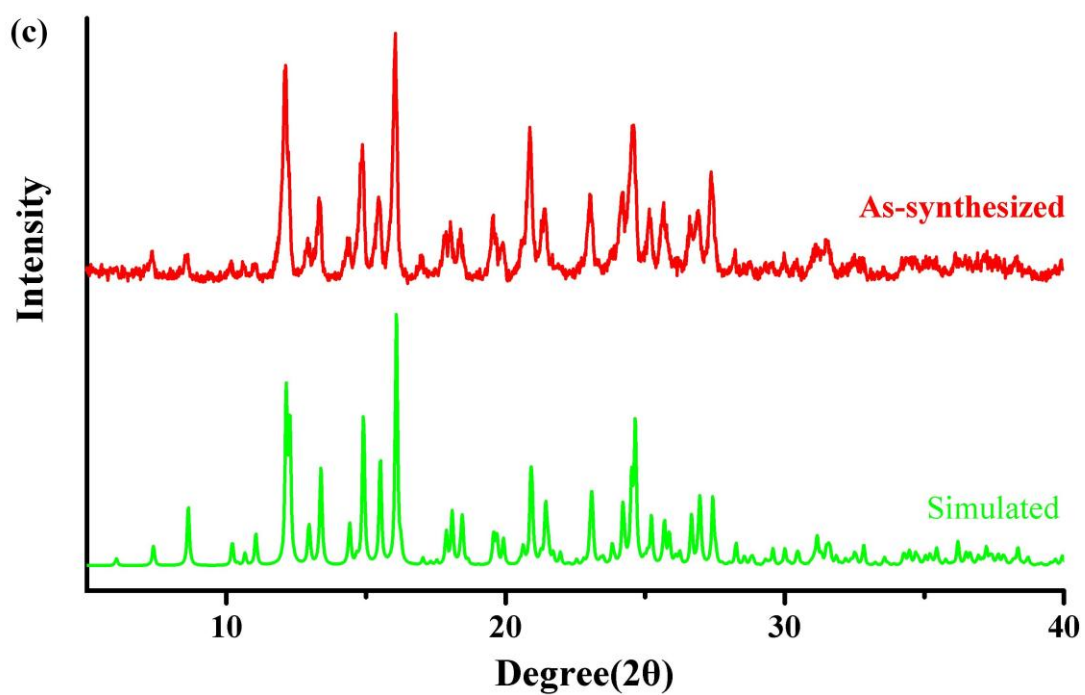

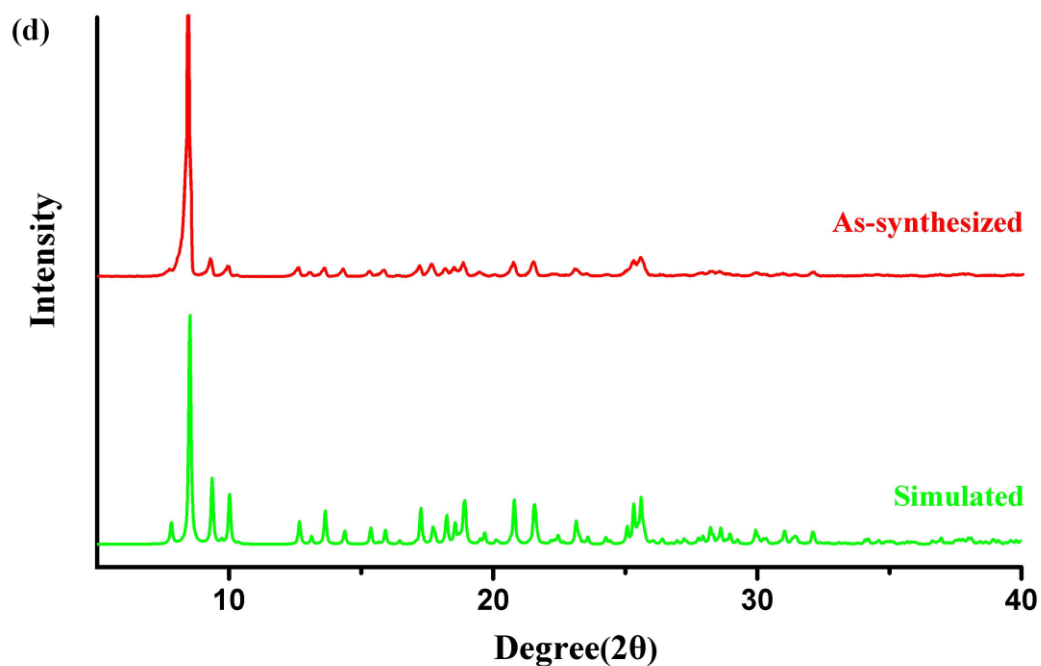

Fig.S1 The PXRD patterns of complexes 1 (a), 2 (b), 3 (c) and 4 (d).

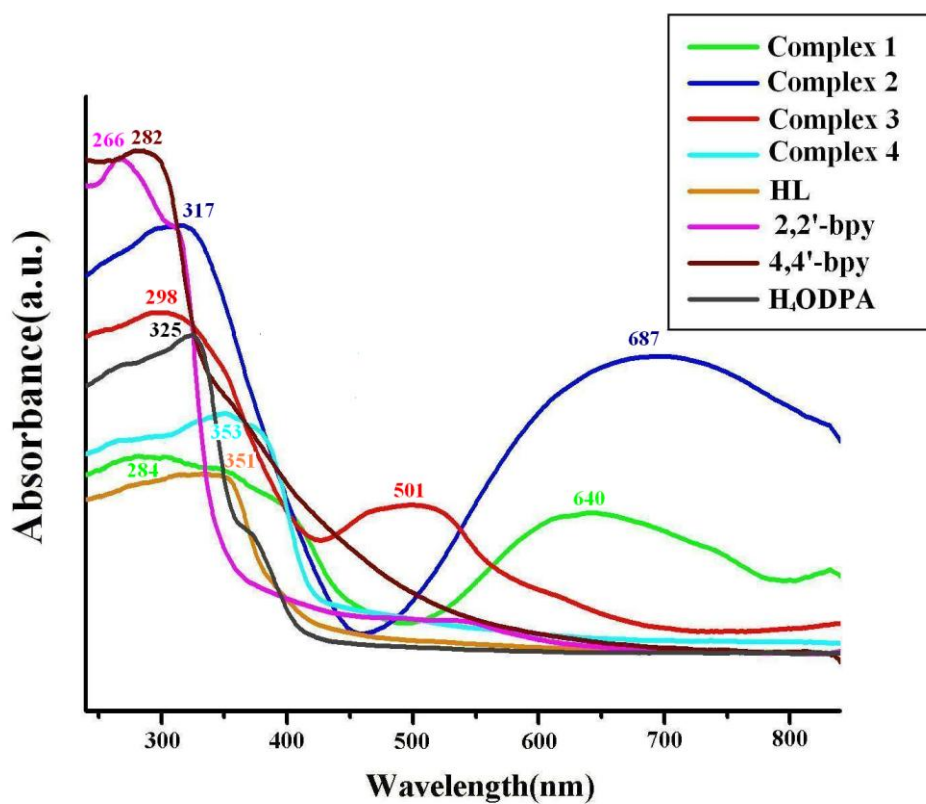

Fig. S2 UV-vis absorption spectra at room temperature for the free ligands and

complexes 1-4.

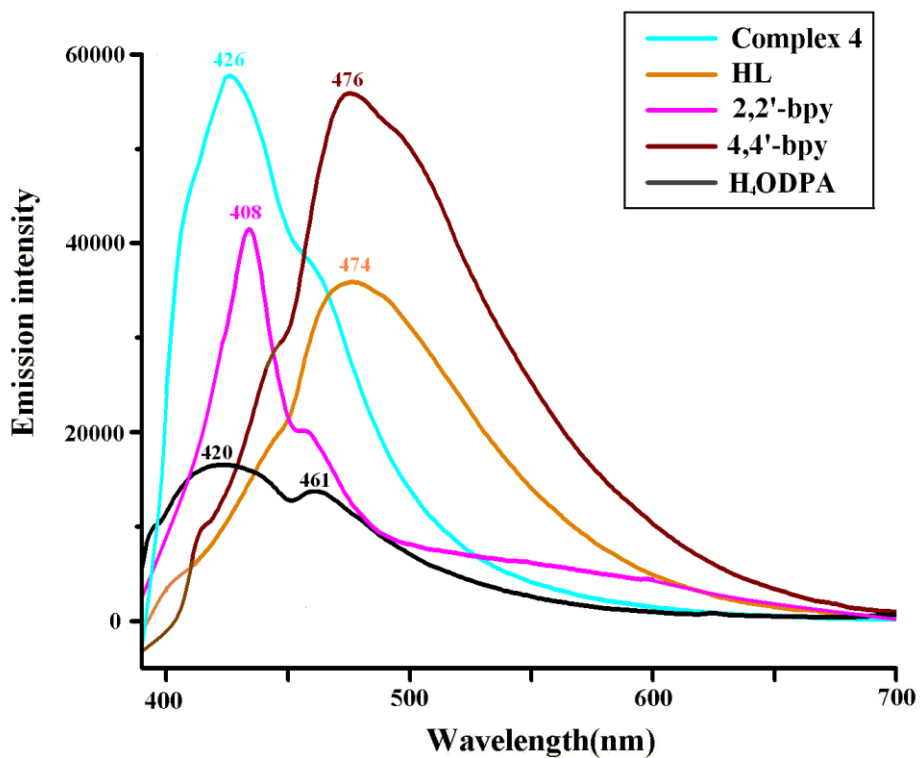

**Fig. S3** Solid-state emission spectra at room temperature for the free organic ligands H<sub>4</sub>ODPA, 4,4'-bpy, 2,2'-bpy, **HL** and complex **4**.

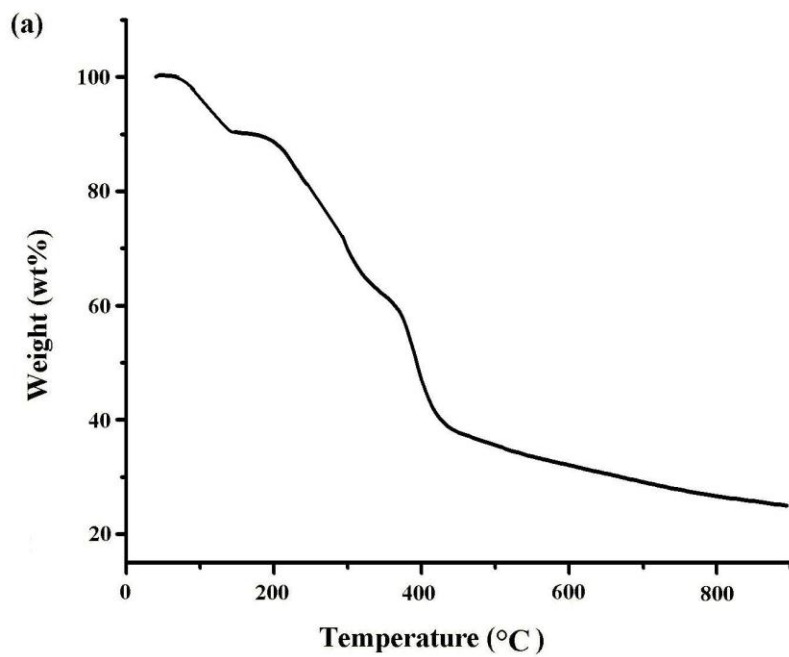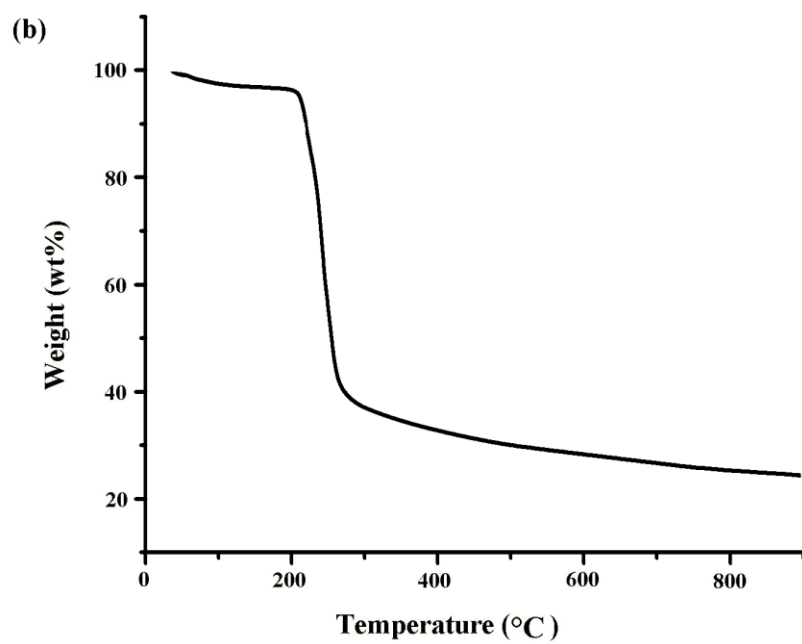

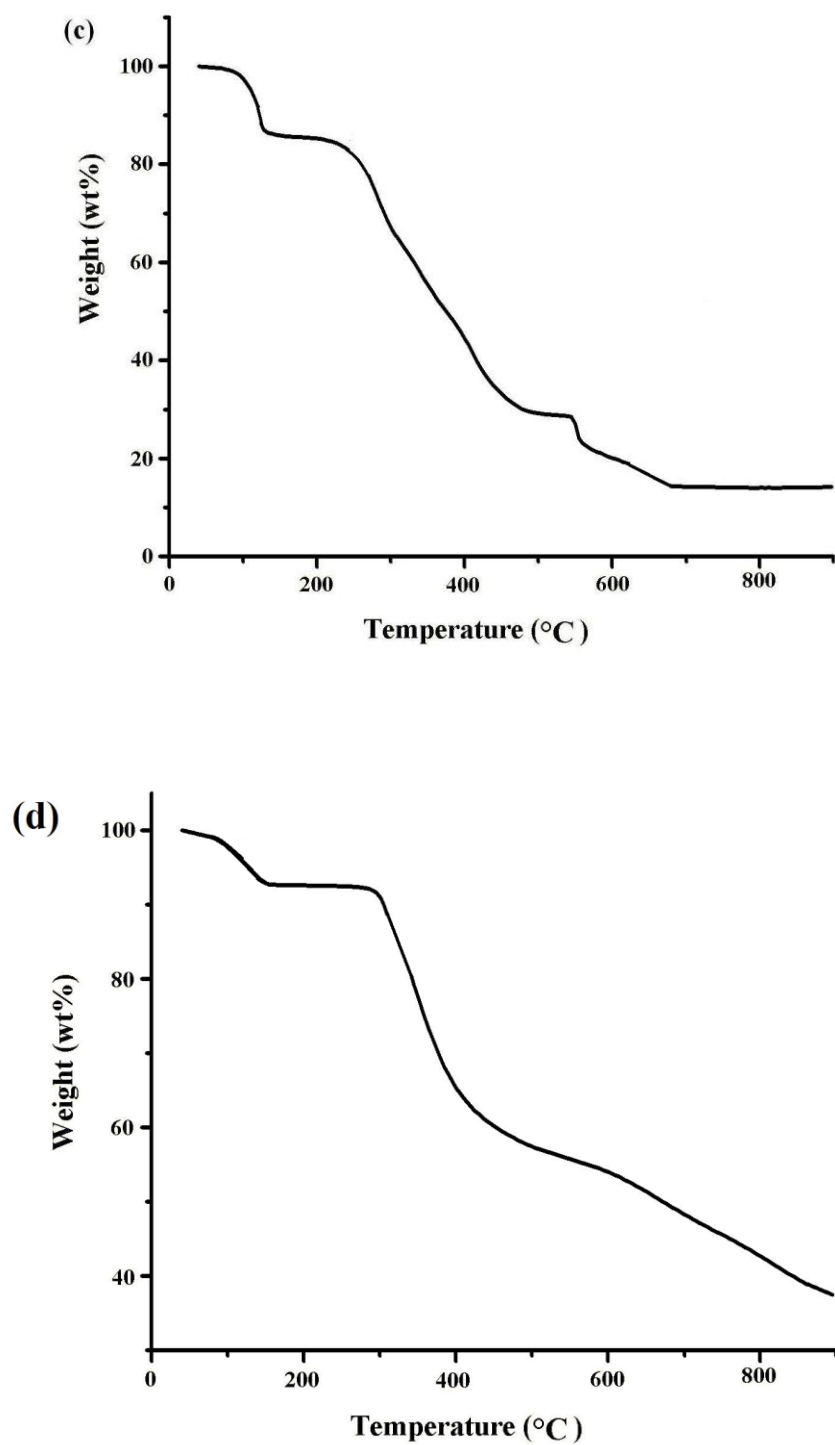

**Fig.S4** Thermogravimetric curves of complexes **1** (a), **2** (b), **3** (c) and **4** (d).
